1 **Regulating Soil Bacterial Diversity, Enzyme Activities and Community**

2 **Composition Using Residues from Golden Apple Snails**

3 Jiaxin Wang<sup>‡1</sup>, Xuening Lu<sup>‡1</sup>, Jiaen Zhang<sup>123\*</sup>, Guangchang Wei<sup>1</sup> and Yue Xiong<sup>1</sup>

4 <sup>1</sup>*Department of Ecology, College of Natural Resources and Environment, South*

5 *China Agricultural University, Wushan Road, Tianhe District, Guangzhou 510642,*

6 *P.R. China*

7 <sup>2</sup>*Guangdong Provincial Key Laboratory of Eco-Circular Agriculture, Guangzhou,*

8 *510642, P.R. China*

9 <sup>3</sup>*Guangdong Engineering Research Center for Modern Eco-agriculture and Circular*

10 *Agriculture, Guangzhou 510642, P.R. China*

---

‡ These authors contributed equally to this work.

\* Corresponding author: jeanzh@scau.edu.cn.

11

## Abstract

12 Golden apple snails (GAS) have become a serious pest for agricultural  
13 production in Asia. A sustainable method for managing GAS is urgently needed,  
14 including potentially using them to produce commercial products. In this study, we  
15 evaluate the effects of GAS residues (shell and meat) on soil pH, bacterial diversity,  
16 enzyme activities, and other soil characteristics. Results showed that the amendment  
17 of GAS residues significantly elevated soil pH (to near-neutral), total organic carbon  
18 (TOC) (by 10-134%), NO<sub>3</sub>-N (by 46-912%), NH<sub>4</sub>-N (by 18-168%) and total nitrogen  
19 (TN) (by 12-132%). Bacterial diversity increased 13% at low levels of amendment  
20 and decreased 5% at high levels, because low-levels of GAS residues increased soil  
21 pH to near-neutral, while high-levels of amendment substantially increased soil  
22 nutrients and subsequently suppressed bacterial diversity. The dominant phyla of  
23 bacteria were: Proteobacteria (about 22%), Firmicutes (15-35%), Chloroflexi  
24 (12%-22%), Actinobacteria (8%-20%) Acidobacteria, Gemmatimonadetes,  
25 Cyanobacteria and Bacterioidetes. The amendment of GAS residues significantly  
26 increased the relative abundance of Firmicutes, Gemmatimonadetes, Bacterioidetes  
27 and Deinococcus-Thermus, but significantly decreased the relative abundance of  
28 Chloroflexi, Actinobacteria, Acidobacteria, Cyanobacteria and Planctomycetes. Our  
29 results suggest that GAS residues treatment induces a near-neutral and nutrient-rich  
30 soil. In this soil, soil pH may not be the best predictor of bacterial community  
31 composition or diversity; rather soil nutrients (*ie.*, NH<sub>4</sub>-N and NO<sub>3</sub>-N) and soil TOC  
32 showed stronger correlations with bacterial community composition. Overall, GAS

33 residues could replace lime for remediation of acidic and degraded soils, not only to  
34 remediate physical soil properties, but also microbial communities.

35 **Keywords:** bacterial diversity; enzyme activities; golden apple snail; soil nutrients;  
36 16S rRNA

### 37 **Importance**

38 The wide spreading golden apple snail (GAS) is a harmful pest to crop  
39 productions and could result in soil and air pollutions after death. In the previous  
40 study, we developed a biocontrol method: adding GAS residues to acidic soil to  
41 mitigate the living GAS invasion and spread, improve soil quality, and reduce soil and  
42 air pollution. However, the effects of GAS residues amendment on bacterial diversity  
43 and community still remain unclear. This study provided insights into bacterial  
44 diversity and community compositions to facilitate the evaluation of GAS residues  
45 application.

46

## 47 **1 Introduction**

48 Invasive golden apple snails (GAS) *Pomacea canaliculata* (Lamarck) have  
49 become a serious pest for agricultural production in Asia (1). A series of control  
50 methods have been developed (2, 3); the most widely used is chemical control by  
51 molluscicides (4), which, could harm environmental and human health (5). A better  
52 method for sustainable management is urgently needed, potentially by using them to  
53 produce commercial products.

54 Studies have reported that GAS contains abundant  $\text{CaCO}_3$  and proteins, and  
55 could be used as feed for livestock such as pigs and ducks (6). However, only small  
56 GAS can be eaten by ducks or pigs, because the hard shells of large adult GAS make  
57 them unpalatable. The  $\text{CaCO}_3$  in GAS can also neutralize acidic soils, similar to lime.  
58 However, lime tends to lead to soil compaction, Si and P deficiency, and reduced soil  
59 microbial biomass and diversity.

60 Anthropogenic N inputs to terrestrial ecosystems have increased three- to  
61 five-fold over the past century (7). High levels of N fertilization can drive soil  
62 acidification both directly and indirectly (8). J. H. Guo et al. (8) found that  
63 anthropogenic acidification driven by N fertilization is at least 10 to 100 times greater  
64 than that associated with acid rain. The application and deposition of N is expected to  
65 continue to increase (9).

66 To alleviate soil acidification and control the invasion of the GAS, we have  
67 proposed using powered residues from GAS to mitigate soil acidification  
68 (unpublished data). The application of GAS residues can significantly increase soil

69 pH and nitrate nitrogen ( $\text{NO}_3\text{-N}$ ) both at a high and low amendment levels, and can  
70 increase soil total organic carbon (TOC), total nitrogen (TN), ammonium nitrogen  
71 ( $\text{NH}_4\text{-N}$ ) and  $\text{NO}_3\text{-N}$  compared with controls and with liming, which has no  
72 significant effect on soil nutrients (unpublished data). Although our previous research  
73 has indicated that the addition of GAS residues could significantly increase soil  
74 microbial biomass and regulate microbial community structure, the mechanisms by  
75 which GAS residues regulate microbial community composition, relative abundance  
76 and diversity remain unknown.

77 Previous studies have proposed soil pH and N input as the main predictors of soil  
78 microbial diversity in soils (10-12). However, the responses of soil microbes to  
79 elevated N inputs and pH are inconsistent. Numerous studies have revealed that N  
80 addition led to significant reductions in soil microbial activity (13), diversity (14) and  
81 community composition (15) because of increases in C sequestration and/or decreased  
82 soil respiration rates (13). Some studies have suggested that neutral soils support  
83 greater bacterial diversity than do acidic soils (10, 11). However, some researchers  
84 have suggested the opposite—that forest soils with lower pH support greater  
85 microbial diversity than agricultural soils with higher pH values (16).

86 Soil extracellular enzymes play key roles in biological soil processes,  
87 specifically in the degradation of soil organic compounds and the mineralization and  
88 recycling of nutrients related to C, N, P and S (17). Environmental factors, including  
89 water (18), salinity (18), pollution (19), soil nutrients (20), temperature (21) and soil  
90 pH can affect the activities of extracellular enzymes directly or indirectly.

91 Here, we conducted a series of greenhouse experiments amending GAS residues  
92 and lime to acidic and degraded soils. We hypothesize that GAS residues and  
93 lime—both of which increase soil pH—may differ in their regulation of microbial  
94 community structure, diversity and microbial enzyme activities. The objectives of this  
95 study were: (1) to explore bacterial community composition and diversity in soils  
96 neutralized with powdered GAS residues, (2) to determine key factors controlling the  
97 composition of bacterial communities, (3) and assess differences in bacterial  
98 communities in soils treated with GAS residues and soils treated with lime.

99

## 100 **2 Materials and methods**

### 101 *2.1 Testing materials*

102 Golden apple snails (GAS) were collected from the paddy fields at the Xin Tang  
103 (Ning Xi) Research and Educational Station of South China Agricultural University,  
104 which is located in Zengcheng City, Guangdong Province, China. The snails were  
105 washed and frozen at  $-40^{\circ}\text{C}$  in a freezer for 24h. Then the dead snails were dried,  
106 grounded into powder and stored in a desiccator. A slightly acidic soil was also  
107 collected from the paddy fields with the pH levels ranging from 6.25 to 6.53. The soil  
108 predominately consists of medium (38%) and fine (22%) sand, silt (36%) and clay  
109 (4%) and has  $16.38\text{ g kg}^{-1}$  of TOC,  $2.20\text{ g kg}^{-1}$  of TN and  $0.58\text{ g kg}^{-1}$  of total  
110 phosphorus (TP).

### 111 *2.2 Experimental design*

112 Experiments were conducted in a greenhouse on the campus of South China

113 Agricultural University. We implemented three treatments: (1) the control treatment  
114 with soil only (CK); (2) soil amended with GAS residues (*i.e.*, shell and meat) (SR);  
115 and (3) soil amended with lime (SL). Each treatment had six levels of amendment: 0.5,  
116 1, 2.5, 25, 50, and 100 g kg<sup>-1</sup>. Amendments were homogenized with soil in each  
117 treatment and carefully packaged in a polyvinyl chloride (PVC) column with a  
118 diameter of 180 mm and a height of 260 mm. A filter paper was mounted at the  
119 bottom of the column to prevent loss of soil or GAS residues. A base plate was also  
120 placed at the bottom of the column to position the column. About 400 ml of deionized  
121 water (pH = 7.0±0.1) were sprayed to the column each week to prevent the column  
122 from drying. Each treatment was triplicated in this study. After 120 days incubation,  
123 the soil samples were collected and stored at 4 °C for about 4h.

### 124 *2.3 Soil analysis*

125 Soil samples were homogenized by hand and passed through a 2mm sieve to  
126 remove rocks, roots and organic residues, and then divided evenly into three  
127 subsamples. These three subsamples were treated as follows: the first subsamples  
128 were stored at room temperature (about 22 °C) for about 4h, the second subsamples  
129 were stored at 4 °C, and the third subsamples were stored at -20 °C for further analysis.  
130 The room temperature (first) subsamples were air dried, grounded and analyzed for  
131 soil pH, TOC, TN, available phosphorous (AP), ammonium nitrogen (NH<sub>4</sub>-N) and  
132 nitrate nitrogen (NO<sub>3</sub>-N). The second subsamples were analyzed for soil gravimetric  
133 moisture and extracellular enzyme activity. The third subsamples were freeze-dried  
134 and grounded into power and passed through a 0.25 mm sieve for high-throughput

135 sequencing analysis.

136 Soil pH was measured from fresh soil slurries (1 g of soil: 2.5 ml of deionized  
137 water) using a handheld multiparameter meter (SX-620, SAN XIN, China).  
138 Approximately 20 mg of each powdered sample was analyzed for TOC and TN using a  
139 C analyzer (TOC-VCSH, Shimadzu Corp., Kyoto, Japan). Concentrations of  $\text{NH}_4\text{-N}$   
140 were analyzed using a UV-vis spectrophotometer at a wavelength of 420 nm (22).  
141 Concentrations of  $\text{NO}_3\text{-N}$  were determined using a UV-vis spectrophotometer  
142 applying double wavelength of 275 nm and 220 nm (22). Concentrations of AP were  
143 analyzed using the molybdenum-antimony anti-spectrophotometric method (23).

#### 144 *2.4 Extracellular enzyme assay*

145 Soil enzyme activities, including  $\beta$ -1,4-glucosidase (BG), acid phosphatase  
146 (ACP),  $\beta$ -1,4-N-acetylglucosaminidase (NAG) and  $\beta$ -D-cellobiosidase (cellulose  
147 degradation; CB), were measured using fluorometry as described in C. W. Au - Bell et  
148 al. (24), with minor modifications. In brief, 1 g of soil was weighted and dissolved in  
149 a porcelain evaporating dish with 125 ml of acetate-acetate buffer solution and  
150 blended for 30 min on a magnetic stirrer (JB-3, Ronghua, Jianfsu) at 200 rpm. Soil  
151 buffer solution (200  $\mu\text{l}$ ) was sucked from the dish and injected into a deep-well plate  
152 (Labtide, Greystone Biosciences LLC, USA), and then 50  $\mu\text{l}$  each of buffer, substrate  
153 and 4-Methylumbelliferyl (MUB) was pipetted and injected into deep-well plates,  
154 representing a blank well, sample well and quench well, respectively. We used 200  $\mu\text{l}$   
155 of buffer plus 50  $\mu\text{l}$  of substrate as the negative well and 200  $\mu\text{l}$  buffer plus 50  $\mu\text{l}$  of  
156 MUB as the reference standard well. Incubation was conducted in a constant



157 temperature incubator (RXZ, Dongqi, Ningbo, China) at 37 °C for 3 h. After  
158 incubation, the sample was centrifuged (Eppendorf, USA) at 2900 rpm for 3 min, and  
159 the supernate was pipetted and injected into a black flat-bottomed 96-well microplate  
160 for fluorescence determination in a microplate reader (SYNERGY H1, BioTek, USA)  
161 at the excitation wavelength of 365 nm and emission wavelength of 450 nm.

## 162 *2.5 Bacterial community and diversity analysis*

163 Bacterial community structure and diversity in soils were determined by 16S  
164 rRNA. Soil DNA was extracted with the E.Z.N.A.<sup>®</sup> soil DNA Kit (Omega Bio-tek,  
165 Norcross, GA, USA.) in accordance with manufacturer's instructions. The extracted  
166 DNA was quantified by spectrophotometry (Nanodrop 2000, Thermo Scientific, UAS)  
167 and stored at -20 °C. Polymerase chain reaction (PCR) was carried out using the  
168 universal primer set 338F (5'- ACTCCTACGGGAGGCAGCAG-3') and 806R  
169 (5'-GGACTACHVGGGTWTCTAAT-3') by thermocycler PCR system (GeneAmp  
170 9700, ABI, USA). PCR was performed to amplify 1 µl of template DNA in a 20-µl  
171 reaction system containing 4 µl of 5 × FastPfu Buffer, 2 µl of 2.5 mM dNTPs, 0.8 µl  
172 of each primer (5 µM), 0.4 µl of FastPfu Polymerase and 10 ng of template DNA.  
173 Amplification was performed in triplicate as follows: 95 °C for 3 min; 27 cycles of  
174 95 °C for 30 s, 30s for annealing at 55 °C, and 45s for elongation at 72 °C; and a final  
175 extension at 72 °C for 10 min. PCR reactions were performed in triplicate 20 µl  
176 mixture containing 4 µl of 5 × FastPfu Buffer, 2 µl of 2.5 mM dNTPs, 0.8 µl of each  
177 primer (5 µM), 0.4 µl of FastPfu Polymerase and 10 ng of template DNA. The  
178 resulting PCR products were extracted from a 2% agarose gel and further purified

179 using the AxyPrep DNA Gel Extraction Kit (Axygen Biosciences, Union City, CA,  
180 USA) and quantified using QuantiFluor™ -ST (Promega, USA) according to the  
181 manufacturer's protocol. Purified amplicons were pooled in equimolar and paired-end  
182 sequenced ( $2 \times 300$ ) on an Illumina MiSeq platform (Illumina, San Diego, USA)  
183 according to the standard protocols by Majorbio Bio-Pharm Technology Co. Ltd.  
184 (Shanghai, China). Raw fastq files were demultiplexed, quality-filtered by  
185 Trimmomatic and merged by FLASH with the following criteria: (i) The reads were  
186 truncated at any site receiving an average quality score  $< 20$  over a 50 bp sliding  
187 window. (ii) Primers were exactly matched allowing 2 nucleotide mismatching, and  
188 reads containing ambiguous bases were removed. (iii) Sequences with overlaps longer  
189 than 10 bp were merged according to their overlap sequences. Operational taxonomic  
190 units (OTUs) were clustered with 97% similarity cutoff using UPARSE (version 7.1  
191 <http://drive5.com/uparse/>) and chimeric sequences were identified and removed using  
192 UCHIME. The taxonomy of each 16S rRNA gene sequence was analyzed by RDP  
193 Classifier algorithm (<http://rdp.cme.msu.edu/>) against the Silva (SSU123) 16S rRNA  
194 database using confidence threshold of 70%.

## 195 *2.6 Data analysis*

196 Analysis of Variance (ANOVA) was performed using SPSS. Differences in  
197 microbial communities were tested using ANOSIM with 9,999 permutations. A  
198 non-metric multidimensional scaling (NMDS) ordination to illustrate the clustering of  
199 bacterial community composition variation was conducted using the Vegan software  
200 based on the Bray-Curtis distance of genus. We used Spearman correlations to identify

201 significant relationships between soil parameters (involved in six amendment levels of  
202 GAS residues and five amendment levels of lime treatments) and the most abundant  
203 phyla and genera. To evaluate bacterial diversity in amended soils, Shannon index (25)  
204 was applied. To compare microbial communities and identify specialized  
205 communities in samples, we used the LEfSe tool (26). Statistical analysis was  
206 performed only from the phylum to the genus level to simplify the computation.  
207 Non-metric multidimensional scaling (NMDS) of soil bacteria community  
208 composition based on Bray-Curtis distances linear regression after amending with  
209 lime and GAS residues were conducted to explore the main factors affected soil  
210 bacterial community compositions.

211

## 212 **3 Results and discussion**

### 213 *3.1 Amendment effects on soil properties*

214 Amendments of GAS residues and lime resulted in increased soil pH (Fig. 1a).  
215 The addition of 1.0-2.5 g kg<sup>-1</sup> GAS residue increased soil pH to neutral (7.0) and  
216 additional amendments further increasing pH. Even the smallest amendment of lime  
217 (0.5 g kg<sup>-1</sup>) changed soil pH sharply from acidic to light alkaline (pH > 7.8) (Fig. 1a).  
218 The effect of GAS residues on pH may have been mitigated by the decomposition of  
219 proteins (from the snail meat) into amino acids and glucose by soil microbes (27).

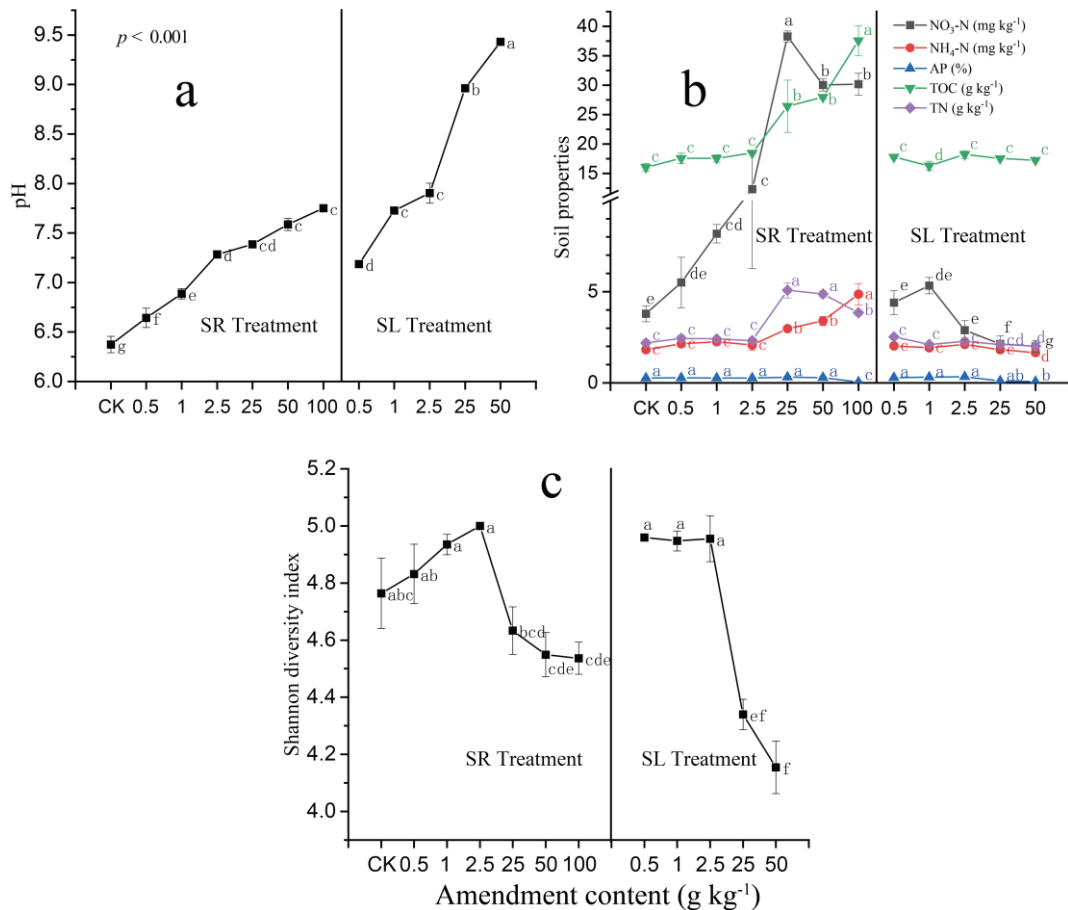

220

221 Fig. 1. Variations of Soil pH (a), TOC and nutrients (b), and (c) Shannon diversity  
 222 index of bacterial induced by the amendment of GAS residues (SR) and lime (SL) in  
 223 acid soil after incubated for 120 days; where soil properties were indicated by color  
 224 lines, TOC (Total Organic Carbon, green), NO<sub>3</sub>-N (nitrite, black), TN, (Total Nitrogen,  
 225 purple) NH<sub>4</sub>-N (ammonia, red) and AP (Available Phosphorus, blue) (n=3).

226

227 Addition of GAS residues also increased soil carbon and soil  
 228 nutrients—specifically, TOC, TN, NO<sub>3</sub>-N and NH<sub>4</sub>-N (Fig. 1b). TOC and NH<sub>4</sub>-N  
 229 progressively increased as more GAS residues were added, increasing by 134.28%  
 230 (TOC) and 167.80 % (NH<sub>4</sub>-N) with the amendment of 100 g kg<sup>-1</sup> GAS residue. Soil  
 231 nitrogen, TN and NO<sub>3</sub>-N showed peak values when 25 g kg<sup>-1</sup> GAS residues were

232 added, a threshold value prior to which proteins in the GAS residues decomposed or  
233 dispersed quickly, but after which anaerobic soils limited the activities of soil  
234 microbes and the transfer of proteins into small molecular and inorganic matter so that  
235 more NH<sub>4</sub>-N and NO<sub>x</sub> were produced and released into the air (27).

### 236 *3.2 Amendment effects on bacterial diversity*

237 Soil pH and nutrients are the important factors that can affect the soil bacterial  
238 community and diversity indicated by Shannon index. Amendment of GAS residues  
239 and lime both significantly affected soil bacterial diversity (Fig. 1c). Specifically,  
240 amendment of up to 2.5 g kg<sup>-1</sup> GAS residues increased diversity, as measured by  
241 Shannon diversity index, from 4.76 (CK) to 4.99. The addition of more GAS residue  
242 decreased bacterial diversity; the addition 75 g kg<sup>-1</sup> GAS residues resulted in the  
243 lowest Shannon diversity index value (4.55) across treatments. Similar to GAS  
244 residue, the addition of lime had a positive effect on diversity, but had a negative  
245 effect when more than 2.5 g kg<sup>-1</sup> was added (Fig. 1c).

246 Previous studies have proposed that soil pH affects soil bacterial community  
247 structure and diversity (11, 28-30). N. Fierer and R. B. Jackson (10) found that the  
248 diversity and richness of soil bacterial communities differed by ecosystem type, and  
249 these differences could largely be explained by soil pH ( $r^2 = 0.70$  and  $r^2 = 0.58$ ,  
250 respectively;  $P < 0.0001$  in both cases). Bacterial diversity was highest in neutral soils  
251 and lower in acidic soils, with soils from the Peruvian Amazon the most acidic and  
252 least diverse in their study (10). Our results were consistent with the observations  
253 reported in biochar amendment by Q. Li et al. (31), which found that bacterial

254 diversity was relatively low in alkaline soils. We found that soil bacterial diversity  
255 increased with the additions of GAS residues and lime amendments between 0.5-2.5 g  
256  $\text{kg}^{-1}$ , likely because of the shift from acidic to neutral soil pH. Bacterial diversity  
257 declined when more GAS residue or lime were added (more than 25  $\text{g kg}^{-1}$ ), likely  
258 due to different factors. For the SL (lime) treatment, high soil pH likely restricted the  
259 growth and reproduction of soil bacteria. This is consistent with the results reported  
260 by J. Xiong et al. (32), in which soil pH was negatively correlated with soil bacterial  
261 diversity in alkaline lake sediments across the Tibetan Plateau. Nevertheless, for the  
262 SR (GAS residues) treatment, high soil nutrients, such as  $\text{NO}_3\text{-N}$  and  $\text{NH}_4\text{-N}$ , likely  
263 contributed to the simplification of bacterial diversity. These results were contrast to  
264 the previous work, in that the addition of N had no significant effect on bacterial  
265 diversity while elevated P could increase bacterial diversity marginally (33).

266       However, pH was not likely responsible for the decline of soil bacterial diversity  
267 in the SR (GAS residue) treatment, because the peak value of soil pH in the SR  
268 treatment was equal or less than 7.8, the pH that yielded maximum bacterial diversity  
269 in the SL treatment. Instead elevated soil nutrients likely caused declines in bacterial  
270 diversity in the SR treatment. Soil nutrient concentrations were significantly  
271 negatively correlated with bacterial diversity index (Table S1). For example, TOC, TN,  
272  $\text{NH}_4\text{-N}$  and  $\text{NO}_3\text{-N}$  were all negatively correlated with Shannon ( $p < 0.05$ ) index. B. J.  
273 Campbell et al. (14) and A. Koyama et al. (34) reported similar negative relationships  
274 between bacterial diversity and N additions in Arctic tundra soils. Our results contrast,  
275 however, with other studies that show positive relationships between soil nutrients

276 and bacterial diversity (33), which could be caused by differences in the types of soil,  
277 and the types and amount of nutrients amended (10, 35, 36).

### 278 3.3 Amendment effects on bacterial community composition

279 Our assessment generated 2016767 high-quality 16S rRNA gene sequences. The  
280 bacterial community composition of the soil samples shifted significantly as a result  
281 of the amendment of GAS residues and lime, and were clearly distinguished (Fig. 2a,  
282 ANalysis Of SIMilarity (ANOSIM),  $R = 0.823$ ,  $P < 0.001$ ) among the different  
283 amendment treatments, and such a pattern was confirmed by hierarchical clustering  
284 based on genus (Fig. 2b). Specifically, the analysis identified three groups of bacterial  
285 community compositions (*i.e.*, in soils amended with high concentrations of lime,  
286 soils amended with high concentration of GAS residues and soils amended with low  
287 concentrations of lime or GAS residues). The reason contributed to these changes  
288 may attribute to elevated high soil pH and high nutrients availability induced by over  
289 amended lime and GAS residues.

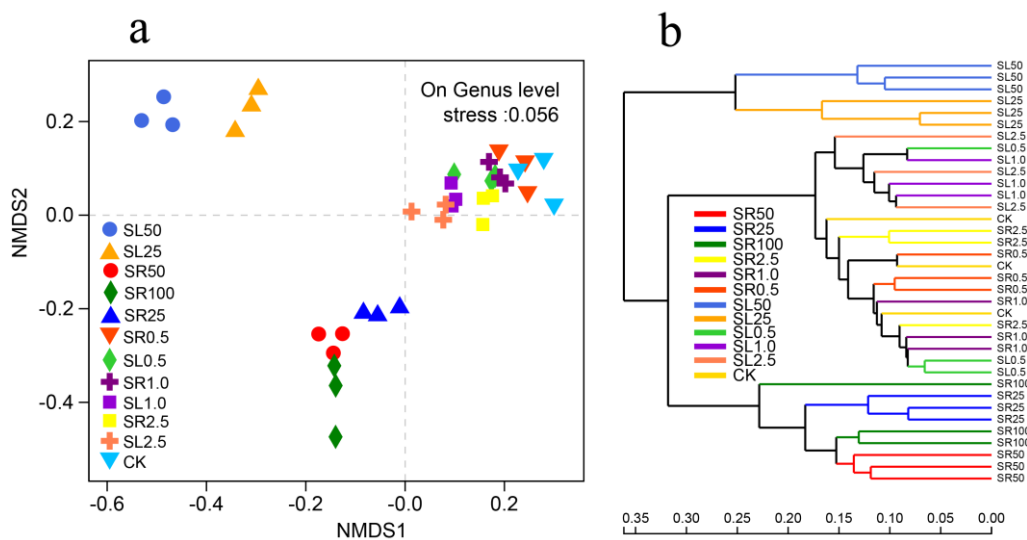

291 Fig. 2. Non-metric multidimensional scaling (NMDS) of soil bacterial communities

292 based on 16S rRNA within plots as affected amendments (a); and hierarchical  
293 clustering of treatments (b). SR represents GAS residues treatments, SL represents  
294 lime treatments and the numbers 0.5, 1, 2.5, 25, 50 and 100 represent the amendment  
295 levels ( $\text{g kg}^{-1}$ ), CK represents the control (n=3)

296 Amendment of GAS residues and lime induced different changes in bacterial  
297 community compositions. The most abundant bacterial phyla detected in soil samples  
298 were Proteobacteria (about 22%), Firmicutes (range from 15 -35%), Chloroflexi  
299 (range from 12% - 22%), Actinobacteria (range from 8% - 20%), Acidobacteria,  
300 Gemmatimonadetes, Cyanobacteria and Bacteroidetes (Fig. 3). The amendment of  
301 GAS residues significantly increased the relative abundance of Firmicutes,  
302 Gemmatimonadetes, Bacteroidetes and Deinococcus-Thermus, but significantly  
303 decreased the relative abundance of Chloroflexi, Actinobacteria, Acidobacteria,  
304 Cyanobacteria and Planctomycetes. In SL (lime) treatments, we detected similar  
305 decreases in the abundance of Chloroflexi, Acidobacteria and Planctomycetes, but in  
306 contrast to SR (GAS residue) treatments, the abundance of Cyanobacteria increased  
307 significantly (Fig. 3). Gemmatimonadetes and Bacteroidetes increased in relative  
308 abundance in SR treatments but not in SL treatments, possibly because  
309 Gemmatimonadetes and Bacteroidetes were responsible for the degradation of soil  
310 carbon and the emission of  $\text{CO}_2$  (37, 38). Amendment of GAS residues (especially  
311 high levels) increased soil TOC, which likely contributed to increases in relative  
312 abundance of Gemmatimonadetes and Bacteroidetes. Our results contrast with  
313 previous studies that found that high soil pH (with biochar addition) resulted in



314 decreases in Firmicutes abundance (39). That result may reflect the integrated effects  
315 of elevated soil pH, C and N (particularly N), because Firmicutes is involved in N  
316 cycling (40).

317 Significant changes of soil bacterial communities in SR (GAS residues)  
318 treatments can also be explained by copiotroph and oligotroph mechanisms driven by  
319 changes in soil nutrients. Copiotrophs preferentially consume labile soil organic C  
320 pools, have high nutritional requirements, and can exhibit high growth rates when  
321 resources are abundant. In contrast, oligotrophs exhibit slower growth rates and are  
322 likely to outcompete copiotrophs in conditions of low nutrient availability due to their  
323 higher substrate affinities (41). In our study, the amendments of GAS residues  
324 induced oligotrophic soil conditions that may have benefited copiotrophs and  
325 disadvantaged oligotrophs. Our results were similar to the previous studies, in that  
326 bacteria belonging to the Acidobacteria phylum were most abundant in soils with very  
327 low resource availability and their relative abundances declined in soils amended with  
328 high concentrations of organic C, N and P (33, 41).

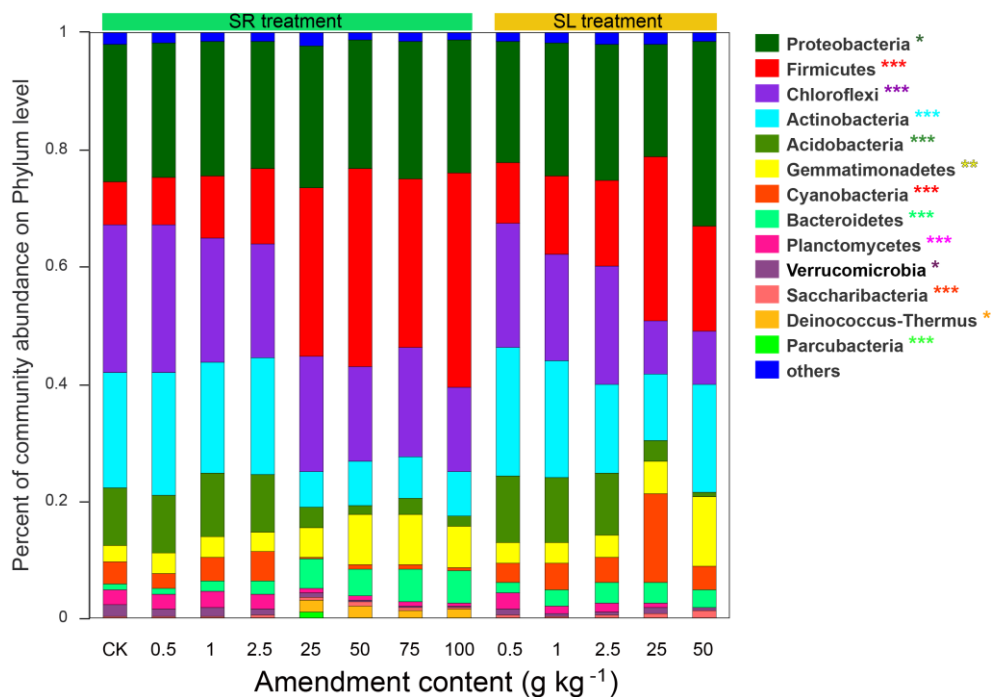

329

330 Fig. 3. 16S rRNA sequence-based microbial community composition of GAS residues  
 331 (SR) and lime (SL) amended soils on the bacterial phylum level. Different colors  
 332 indicate different phylum as showed in legend; and the symptoms \*, \* and \*\*\*  
 333 represent significance at 0.05, 0.01 and 0.001 levels (n=3).

### 334 3.4 Correlations between soil properties and bacterial community composition

335 Our results indicated that soil properties were significantly correlated with  
 336 bacterial phyla (Fig. 4a) and genera (Fig. S1a) in GAS residues amended soils. For  
 337 example, pH, NH<sub>4</sub>-N, NO<sub>3</sub>-N and TN had significant positive correlations with the  
 338 relative abundance of Gemmatimonadetes, Tenericutes, Chlorobi, Firmicutes,  
 339 Bacteroidetes and Deinococcus-Thermus ( $p < 0.01$ ). In addition, significant negative  
 340 correlations were detected with Antinobacteria, Cyanobacteria, Nitrospirae,  
 341 Acidobacteria, Planctomycetes and Verrucomicrobia ( $p < 0.01$ ). As previously  
 342 discussed, Gemmatimonadetes, Tenericutes, Chlorobi, Firmicutes, Bacteroidetes and  
 343 Deinococcus-Thermus are all involved in C and N cycling, and amendment of GAS

344 residues (especially at high concentrations) induced high levels of C and N. The  
345 negative effects of SR treatment on Actinobacteria, Cyanobacteria, Nitrospirae,  
346 Acidobacteria, Planctomycetes and Verrucomicrobia may reflect sensitivities of some  
347 of these groups to higher soil pH; previous studies have found that some of these  
348 groups decrease in abundance after fertilizers are applied. For instance, D. R.  
349 Nemergut et al. (37) reported that the relative abundance of Verrucomicrobia declined  
350 in a fertilized soil. R. T. Jones et al. (42) reported that the abundance of Acidobacteria  
351 relative to other bacterial taxa was highly variable across soils, but correlated strongly  
352 and negatively with soil pH. B. J. Baker et al. (43) and N. Xu et al. (44) reported that  
353 Nitrospirae was active in nitrogen cycling, specifically as nitrite oxidation, and SR  
354 treatment may have increased labile nitrogen availability in the soil, possibly  
355 restricting growth of Nitrospirae. Although S. N. R. Prasanna (45) reported that  
356 Cyanobacteria prefer neutral to slightly alkaline pH for optimum growth, high  
357 nutrients may restrict its relative abundance.

358

359

360

361

362

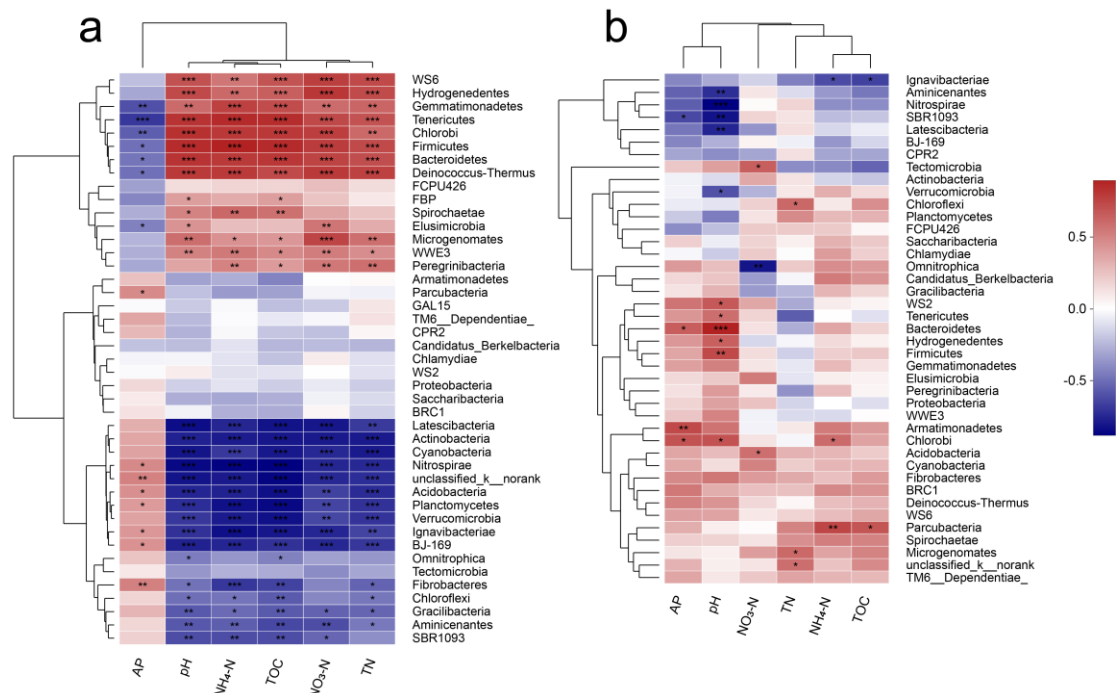

363

364 Fig. 4. Spearman correlations between soil properties and bacterial community  
 365 composition on phylum level after amendment of GAS residues (a) and lime (b);  
 366 where blue and red colors represent negative and positive correlations,; TOC  
 367 represents total organic carbon, TN represents total nitrogen, N-NH<sub>4</sub><sup>+</sup> represents  
 368 ammonia, N-NO<sub>3</sub><sup>-</sup> represents nitrite and AP represents available phosphorus, and the  
 369 symptoms \*, \*\* and \*\*\* represent significant levels of 0.05, 0.01 and 0.001(n=3).

370 For the SR treatments, most significant correlations were found in soil pH; the  
 371 only groups with relative abundance that was significantly positively related to pH  
 372 were Bacteroidetes, Firmicutes and Chlorobi with soil pH (Fig. 4a). Fewer phyla  
 373 showed significant correlations with soil nutrients in the SL treatments compared to  
 374 the SR treatments. These results suggest that more phyla were affected by C, N (*ie.*,  
 375 TOC, NH<sub>4</sub>-N, NO<sub>3</sub>-N and TN) in SR treatments. In SR treatments, which increased  
 376 both soil pH and nutrient contents, soil pH does not appear to be a good predictor of  
 377 bacterial community composition and diversity.

378 To evaluate the main factors driving changes in microbial communities in our  
379 experimental treatments, we used Non-metric multidimensional scaling (NMDS) of  
380 soil bacteria community composition based on Bray-Curtis distances linear regression  
381 (Fig. 5). In SL treatments, soil pH was the factor most strongly related to changes in  
382 bacterial community composition ( $R^2 = 0.90$ ) (Fig. 5a). However, in SR treatments  
383 soil nutrients tend to shape changes in bacteria composition (Fig. 5b). Our results are  
384 consistent with previous research that included a sub-set of the soils included in this  
385 survey; they found that the abundances of Bacteroidetes, Betaproteobacteria, and  
386 Acidobacteria were most strongly related to estimated carbon availability, not soil pH  
387 (41). In addition, soil nutrients (N and P) additions could significantly affect soil  
388 bacterial community compositions were also confirmed (33). Nevertheless, our results  
389 contrast with other studies that suggest pH as a strong predictor of bacterial  
390 community composition and diversity (11, 28, 46).

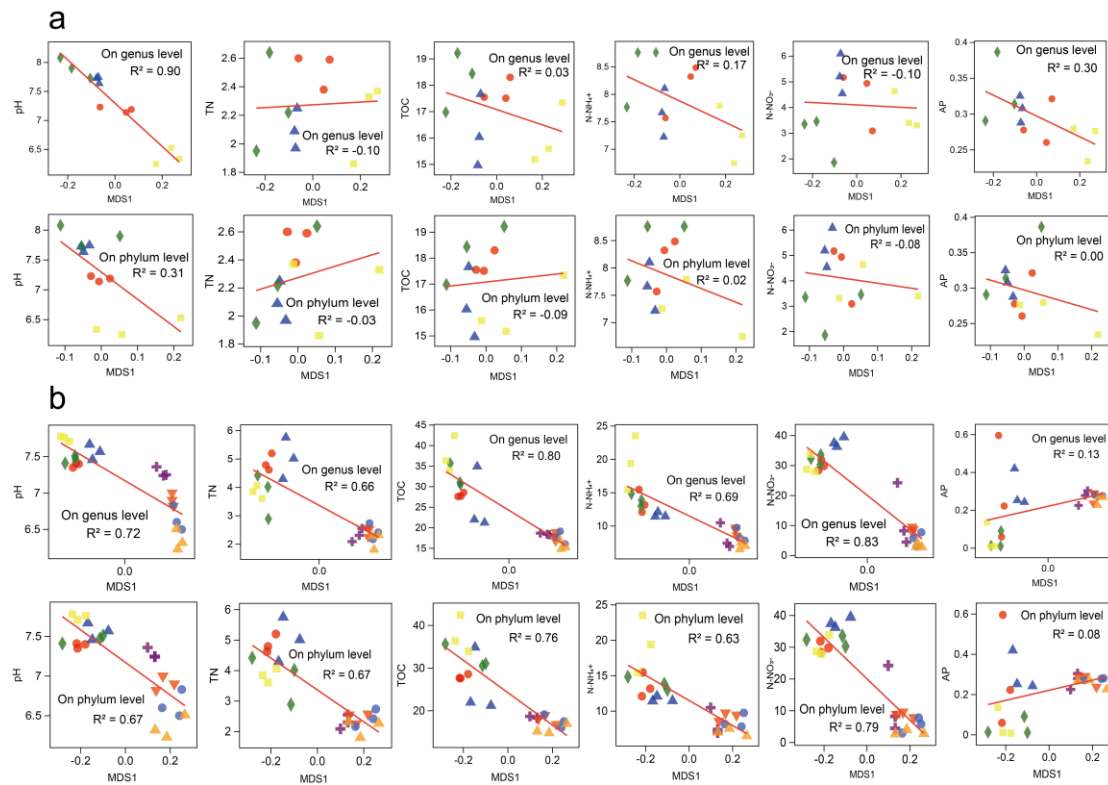

391

392 Fig. 5. Soil properties and Non-metric multidimensional scaling (NMDS) of soil  
 393 bacteria community composition based on Bray-Curtis distances linear regression  
 394 after amending with lime (a) and GAS residues (b); TOC represents total organic  
 395 carbon, TN represents total nitrogen,  $N-NH_4^+$  represents ammonia,  $N-NO_3^-$  represents  
 396 nitrite and AP represents available phosphorus (n=3).

397 Apart from determining diversity another primary goal of comparing microbial  
 398 communities is to identify specialized communities in samples. Groups were shown in  
 399 cladograms, and LDA scores of 2 or greater were confirmed by LefSe (Fig. S2). In  
 400 GAS's residues treated soils, 21 bacteria phyla were enriched dominated with  
 401 Actinobacteria, Bacteroidetes and Firmicutes followed by Acidobacteria,  
 402 Cyanobacteria and other 16 phyla. Firmicutes were most abundant in the GAS  
 403 residues  $50\text{ g kg}^{-1}$  treatment, which may have been caused by the high soil pH; it was  
 404 the same pH as in the lime  $2.5\text{ g kg}^{-1}$  treatment. To evaluate the effects of amendments

405 on shaping microbial community composition, we compared results from high levels  
406 of the GAS residues amendments and low levels of lime amendments with results  
407 from low levels of GAS residues amendments, because high levels of GAS residues  
408 amendments and low levels of lime amendments showed similar effects on soil pH.  
409 The results showed that more specialized bacteria phyla were detected in soils treated  
410 with high levels of GAS residues amendments, which suggests that GAS residues can  
411 shape bacterial community compositions.

### 412 *3.5 Correlations between enzyme activities and bacterial community composition*

413 Four enzymes related to C, N and P cycling in soil were determined to uncover  
414 the status of soil nutrients and C cycling after the amendment of both GAS residues  
415 and lime. We conducted Spearman Correlation analysis to identify the relationships  
416 between microbial communities and soil enzyme activities, and significant  
417 correlations were found in SR treatment (Fig. 6). For example, we found that  $\beta$ -D-  
418 cellobiosidase (CB),  $\beta$ -1,4-N-acetylglucosaminidase (NAG) and  $\beta$ -1,4-glucosidase  
419 (BG) activities were significantly correlated with microbial communities both on  
420 phylum (e.g., Bacteroidetes, Deinococcus-Thermus, Gemmatimonadetes,  
421 Actinobacteria, Acidobacteriae and Nitrospirae) level (Fig. 6a) and genus level (Fig.  
422 S3a) in soils treated with GAS residues amendment. Many fewer correlations were  
423 found in soils treated with lime amendment (Figs. 6b, S3b). The strong correlations in  
424 soils treated with GAS residues may be caused by its influence on substrate such as C  
425 and N. M. Waldrop et al. (47) reported that bacterial community composition was  
426 correlated with BG, ACP, and sulphatase activity, and concluded that enzyme activity

427 may provide a useful linkage between microbial community composition and carbon  
428 processing. As Fig. 6a shows, significant and negative correlations between bacterial  
429 phyla such as Actinobacteria, Acidobacteriae and Nitrospirae, and enzyme activities  
430 such as CB NAG and BG. Previous studies suggested that N additions resulted in  
431 significant reductions in soil microbial activity (13), diversity (14) and community  
432 structure composition (15) because of increases in C sequestration and/or decreases in  
433 soil respiration rates (13). However, in our study, enzyme activities significantly  
434 increased after the addition of GAS residues, which contain abundant N in the form of  
435 proteins and amino acids. It is possible that the elevated organic C and N induced by  
436 GAS residues treatments promoted hydrolyzation but suppressed the mineralization  
437 the C and N (48, 49). Our results are consistent with the results reported by M.  
438 Carreiro et al. (50), who found that microbes responded to N by increasing cellulase  
439 activity.



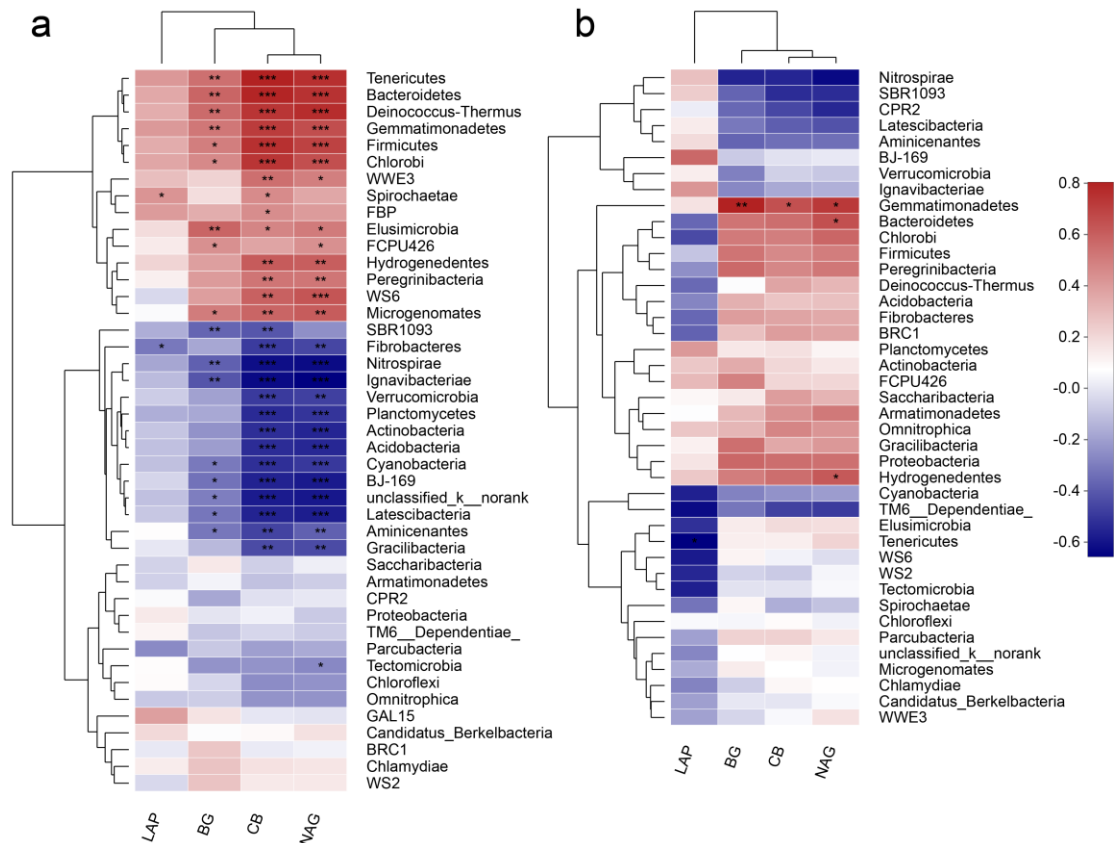

440

441 Fig. 6. Spearman correlations between soil enzyme activities and bacterial community  
 442 composition on phylum level after amendment of GAS residues (SR) (a) and lime (SL)  
 443 (b); where blue and red colors represent negative and positive correlations;  $\beta$ -1,4-  
 444 glucosidase (BG), acid phosphatase (ACP),  $\beta$ -1,4-N-acetylglucosaminidase (NAG)  
 445 and  $\beta$ -D-cellobiosidase (CB); the symptoms \*, \*\* and \*\*\* represent significant  
 446 levels of 0.05, 0.01 and 0.001 (n=3).

447

448 Overall, in this study, the amendment of GAS residues significantly increased  
 449 soil pH due to the  $\text{CaCO}_3$  component of the GAS's shell. However, GAS residues had  
 450 weaker effects on soil pH than did lime treatments. For example, at the same amended  
 451 levels, the pH of soils amended with lime increased sharply, while soils amended with  
 452 GAS residues rose only to near-neutral pH. In addition, amendment of GAS residues

453 resulted in increased levels of soil nutrients, which could in turn lead to increased  
454 bacterial diversity at low amendment levels and decreased bacterial diversity at high  
455 amendment levels. That likely attribute to the amendment of GAS residues induced a  
456 copiotrophic environment in which, the relative abundance of copiotrophic bacterial  
457 communities were increased while oligotrophic bacterial communities were reduced.  
458 What's more, soil pH also responsible for the changes of soil bacterial communities.  
459 For instance, Gemmatimonadetes, Tenericutes, Chlorobi, Firmicutes, Bacteroidetes  
460 and Deinococcus-Thermus were all increased with the addition of GAS residues.  
461 Some of them such as Gemmatimonadetes, Tenericutes, Chlorobi and Bacteroidetes  
462 were increased due to their roles in C and N cycling, while some of them were  
463 decreased because they were suppressed at a higher pH environment. Most  
464 researchers suggested that pH was the best predictor for bacterial diversity and  
465 community compositions across different types of land-use. Nevertheless, in our study,  
466 soil pH may not be the best predictor of bacterial community composition or diversity;  
467 rather soil nutrients (*ie.*, NH<sub>4</sub>-N and NO<sub>3</sub>-N) and soil TOC showed stronger  
468 correlations with bacterial communities. That likely because the amendment of GAS  
469 residues induced elevated soil pH and nutrient content at the same time. Compared  
470 with lime treatment, the amendment of GAS residues caused more enriched bacterial  
471 phyla, that likely due to the soil nutrients difference between GAS residues treatment  
472 and lime treatment. Considering the nutrients cycling, soil enzymes activities related  
473 to C, N and P were determined and analyzed, our results suggested that soil enzymes  
474 activities showed similar correlations to bacterial communities with soil nutrients.

475 Those indicated that the increases in enzymes activities were attributed to the  
476 elevation of soil nutrients induced by the amendment of GAS residues.

#### 477 **4 Conclusion**

478 Our study proposed that GAS residues may be appropriate to remediate acidic  
479 soil, improve soil quality and reduce GAS populations in areas subject to GAS  
480 invasion. In practice, it may not be practical to dry and crush GAS into powder before  
481 applying it to soils. Instead, practitioners could create GAS residues at lower costs by  
482 collecting living or dead GAS, spreading them on the soil surface and smashing them  
483 using high speed rotary tiller. Also, we suggest applying GAS residues to nonirrigated  
484 farmland to reduce the potential water pollution. We suggest amending GAS at 2.5 –  
485 25 g kg<sup>-1</sup>, which appears to be better for soil health and bacterial diversity. These  
486 recommendations warrant further testing in the field, but results of our greenhouse  
487 experiments suggest they hold promise.

488

#### 489 **Acknowledgement**

490 This work was supported by the National Natural Science Foundation of China  
491 (No. U1701236, 31870525, 41871034), Guangdong Modern Agricultural Technology  
492 Innovation Team Construction Project (No. 2018LM1100) and Guangdong Provincial  
493 Key Laboratory of Eco-Circular Agriculture (No. 2019B030301007). We would like  
494 to thank Dr. Abe Miller-Rushing for his assistance with English language and  
495 grammatical editing of the manuscript.

496

497 **References**

- 498 1. Chiu Y-W, Wu J-P, Hsieh T-C, Liang S-H, Chen C-M, Huang D-J. 2014.  
499 Alterations of biochemical indicators in hepatopancreas of the golden apple  
500 snail, *Pomacea canaliculata*, from paddy fields in Taiwan. *Journal of*  
501 *environmental biology* 35:667-673.
- 502 2. Dong S, Zheng G, Yu X, Fu C. 2012. Biological control of golden apple snail,  
503 *Pomacea canaliculata* by Chinese soft-shelled turtle, *Pelodiscus sinensis* in the  
504 wild rice, *Zizania latifolia* field. *Scientia Agricola* 69:142-146.
- 505 3. Guo J, Zhang J-e, Zhao B, Luo M, Zhang C. 2016. The role of spotted green  
506 pufferfish *Tetraodon nigroviridis* in controlling golden apple snail *Pomacea*  
507 *canaliculata*: an effective biological control approach involving a new agent.  
508 *Biocontrol Science and Technology* 26:1100-1112.
- 509 4. Olivier HM, Jenkins JA, Berhow M, Carter J. 2016. A pilot study testing a  
510 natural and a synthetic molluscicide for controlling invasive apple snails  
511 (*Pomacea maculata*). *Bulletin of environmental contamination and toxicology*  
512 96:289-294.
- 513 5. Litsinger J, Estano DB. 1993. Management of the golden apple snail *Pomacea*  
514 *canaliculata* (Lamarck) in rice. *Crop Protection* 12:363-370.
- 515 6. Serra A. 1997. The use of golden snail *Pomacea* Sp. as animal feed in the  
516 Philippines. *Tropicultura* 15:40-43.
- 517 7. Galloway JN, Townsend AR, Erisman JW, Bekunda M, Cai Z, Freney JR,  
518 Martinelli LA, Seitzinger SP, Sutton MA. 2008. Transformation of the

- 519 nitrogen cycle: recent trends, questions, and potential solutions. *Science*  
520 320:889-892.
- 521 8. Guo JH, Liu XJ, Zhang Y, Shen JL, Han WX, Zhang WF, Christie P, Goulding  
522 KWT, Vitousek PM, Zhang FS. 2010. Significant Acidification in Major  
523 Chinese Croplands. *Science* 327:1008-1010.
- 524 9. Zhao Y, Duan L, Xing J, Larssen T, Nielsen CP, Hao J. 2009. Soil  
525 Acidification in China: Is Controlling SO<sub>2</sub> Emissions Enough? *Environmental*  
526 *Science & Technology* 43:8021-8026.
- 527 10. Fierer N, Jackson RB. 2006. The diversity and biogeography of soil bacterial  
528 communities. *Proceedings of the National Academy of Sciences* 103:626-631.
- 529 11. Rousk J, Bååth E, Brookes PC, Lauber CL, Lozupone C, Caporaso JG, Knight  
530 R, Fierer N. 2010. Soil bacterial and fungal communities across a pH gradient  
531 in an arable soil. *The ISME journal* 4:1340-1351.
- 532 12. Lauber CL, Strickland MS, Bradford MA, Fierer N. 2008. The influence of  
533 soil properties on the structure of bacterial and fungal communities across  
534 land-use types. *Soil Biology and Biochemistry* 40:2407-2415.
- 535 13. Ramirez KS, Craine JM, Fierer N. 2012. Consistent effects of nitrogen  
536 amendments on soil microbial communities and processes across biomes.  
537 *Global Change Biology* 18:1918-1927.
- 538 14. Campbell BJ, Polson SW, Hanson TE, Mack MC, Schuur EA. 2010. The  
539 effect of nutrient deposition on bacterial communities in Arctic tundra soil.  
540 *Environmental microbiology* 12:1842-1854.

- 541 15. Yu H, Ling N, Wang T, Zhu C, Wang Y, Wang S, Gao Q. 2019. Responses of  
542 soil biological traits and bacterial communities to nitrogen fertilization  
543 mediate maize yields across three soil types. *Soil and Tillage Research*  
544 185:61-69.
- 545 16. Roesch LFW, Fulthorpe RR, Riva A, Casella G, Hadwin AKM, Kent AD,  
546 Daroub SH, Camargo FAO, Farmerie WG, Triplett EW. 2007. Pyrosequencing  
547 enumerates and contrasts soil microbial diversity. *The Isme Journal* 1:283-290.
- 548 17. Baldrian P. 2009. Microbial enzyme-catalyzed processes in soils and their  
549 analysis. *Plant Soil Environ* 55:370-378.
- 550 18. Frankenberger W, Bingham F. 1982. Influence of Salinity on Soil Enzyme  
551 Activities 1. *Soil Science Society of America Journal* 46:1173-1177.
- 552 19. Wang Y, Shi J, Wang H, Lin Q, Chen X, Chen Y. 2007. The influence of soil  
553 heavy metals pollution on soil microbial biomass, enzyme activity, and  
554 community composition near a copper smelter. *Ecotoxicology and*  
555 *environmental safety* 67:75-81.
- 556 20. Camenzind T, Hättenschwiler S, Treseder KK, Lehmann A, Rillig MC. 2018.  
557 Nutrient limitation of soil microbial processes in tropical forests. *Ecological*  
558 *Monographs* 88:4-21.
- 559 21. Alvarez G, Shahzad T, Andanson L, Bahn M, Wallenstein MD, Fontaine S.  
560 2018. Catalytic power of enzymes decreases with temperature: New insights  
561 for understanding soil C cycling and microbial ecology under warming.  
562 *Global Change Biology* 24:4238-4250.

- 563 22. Dong L, Lin L, Li Q, Huang Z, Tang X, Wu M, Li C, Cao X, Scholz M. 2018.  
564 Enhanced nitrate-nitrogen removal by modified attapulgite-supported  
565 nanoscale zero-valent iron treating simulated groundwater. *Journal of*  
566 *environmental management* 213:151-158.
- 567 23. Bray RH, Kurtz L. 1945. Determination of total, organic, and available forms  
568 of phosphorus in soils. *Soil science* 59:39-46.
- 569 24. Au - Bell CW, Au - Fricks BE, Au - Rocca JD, Au - Steinweg JM, Au -  
570 McMahon SK, Au - Wallenstein MD. 2013. High-throughput Fluorometric  
571 Measurement of Potential Soil Extracellular Enzyme Activities. *JoVE*  
572 81:e50961.
- 573 25. Shannon CE. 1948. A mathematical theory of communication. *Bell system*  
574 *technical journal* 27:379-423.
- 575 26. Zhong Y, Yan W, Shangguan Z. 2015. Impact of long-term N additions upon  
576 coupling between soil microbial community structure and activity, and  
577 nutrient-use efficiencies. *Soil Biology and Biochemistry* 91:151-159.
- 578 27. Keenan SW, Schaeffer SM, Jin VL, DeBruyn JM. 2018. Mortality hotspots:  
579 nitrogen cycling in forest soils during vertebrate decomposition. *Soil Biology*  
580 *and Biochemistry* 121:165-176.
- 581 28. Lauber CL, Hamady M, Knight R, Fierer N. 2009. Pyrosequencing-based  
582 assessment of soil pH as a predictor of soil bacterial community structure at  
583 the continental scale. *Appl Environ Microbiol* 75:5111-5120.
- 584 29. Nicol GW, Leininger S, Schleper C, Prosser JI. 2008. The influence of soil pH

- 585 on the diversity, abundance and transcriptional activity of ammonia oxidizing  
586 archaea and bacteria. *Environmental microbiology* 10:2966-2978.
- 587 30. Delgado-Baquerizo M, Oliverio AM, Brewer TE, Benavent-González A,  
588 Eldridge DJ, Bardgett RD, Maestre FT, Singh BK, Fierer N. 2018. A global  
589 atlas of the dominant bacteria found in soil. *Science* 359:320-325.
- 590 31. Li Q, Lei Z, Song X, Zhang Z, Ying Y, Peng C. 2018. Biochar amendment  
591 decreases soil microbial biomass and increases bacterial diversity in Moso  
592 bamboo (*Phyllostachys edulis*) plantations under simulated nitrogen  
593 deposition. *Environmental Research Letters* 13:1-10.
- 594 32. Xiong J, Liu Y, Lin X, Zhang H, Zeng J, Hou J, Yang Y, Yao T, Knight R, Chu  
595 H. 2012. Geographic distance and pH drive bacterial distribution in alkaline  
596 lake sediments across Tibetan Plateau. *Environmental microbiology*  
597 14:2457-2466.
- 598 33. Leff JW, Jones SE, Prober SM, Barberán A, Borer ET, Firn JL, Harpole WS,  
599 Hobbie SE, Hofmockel KS, Knops JM. 2015. Consistent responses of soil  
600 microbial communities to elevated nutrient inputs in grasslands across the  
601 globe. *Proceedings of the National Academy of Sciences* 112:10967-10972.
- 602 34. Koyama A, Wallenstein MD, Simpson RT, Moore JC. 2014. Soil bacterial  
603 community composition altered by increased nutrient availability in Arctic  
604 tundra soils. *Frontiers in microbiology* 5:1-16.
- 605 35. Gomez E, Ferreras L, Toresani S. 2006. Soil bacterial functional diversity as  
606 influenced by organic amendment application. *Bioresource Technology*



- 607 97:1484-1489.
- 608 36. Freitag TE, Chang L, Clegg CD, Prosser JI. 2005. Influence of inorganic  
609 nitrogen management regime on the diversity of nitrite-oxidizing bacteria in  
610 agricultural grassland soils. *Appl Environ Microbiol* 71:8323-8334.
- 611 37. Nemergut DR, Townsend AR, Sattin SR, Freeman KR, Fierer N, Neff JC,  
612 Bowman WD, Schadt CW, Weintraub MN, Schmidt SK. 2008. The effects of  
613 chronic nitrogen fertilization on alpine tundra soil microbial communities:  
614 implications for carbon and nitrogen cycling. *Environmental microbiology*  
615 10:3093-3105.
- 616 38. Zhang H, Sekiguchi Y, Hanada S, Hugenholtz P, Kim H, Kamagata Y,  
617 Nakamura K. 2003. *Gemmatimonas aurantiaca* gen. nov., sp. nov., a  
618 Gram-negative, aerobic, polyphosphate-accumulating micro-organism, the  
619 first cultured representative of the new bacterial phylum Gemmatimonadetes  
620 phyl. nov. *International journal of systematic and evolutionary microbiology*  
621 53:1155-1163.
- 622 39. Sheng Y, Zhu L. 2018. Biochar alters microbial community and carbon  
623 sequestration potential across different soil pH. *Science of The Total*  
624 *Environment* 622:1391-1399.
- 625 40. Cobo-Díaz JF, Fernández-González AJ, Villadas PJ, Robles AB, Toro N,  
626 Fernández-López M. 2015. Metagenomic assessment of the potential  
627 microbial nitrogen pathways in the rhizosphere of a Mediterranean forest after  
628 a wildfire. *Microbial ecology* 69:895-904.

- 629 41. Fierer N, Bradford MA, Jackson RB. 2007. Toward an ecological  
630 classification of soil bacteria. *Ecology* 88:1354-1364.
- 631 42. Jones RT, Robeson MS, Lauber CL, Hamady M, Knight R, Fierer N. 2009. A  
632 comprehensive survey of soil acidobacterial diversity using pyrosequencing  
633 and clone library analyses. *The ISME journal* 3:442-453.
- 634 43. Baker BJ, Sheik CS, Taylor CA, Jain S, Bhasi A, Cavalcoli JD, Dick GJ. 2013.  
635 Community transcriptomic assembly reveals microbes that contribute to  
636 deep-sea carbon and nitrogen cycling. *The ISME journal* 7:1962-1973.
- 637 44. Xu N, Tan G, Wang H, Gai X. 2016. Effect of biochar additions to soil on  
638 nitrogen leaching, microbial biomass and bacterial community structure.  
639 *European Journal of Soil Biology* 74:1-8.
- 640 45. Prasanna SNR. 2007. Soil pH and its role in cyanobacterial abundance and  
641 diversity in rice field soils. *Applied Ecology and Environmental Research*  
642 5:103-113.
- 643 46. Shen C, Xiong J, Zhang H, Feng Y, Lin X, Li X, Liang W, Chu H. 2013. Soil  
644 pH drives the spatial distribution of bacterial communities along elevation on  
645 Changbai Mountain. *Soil Biology and Biochemistry* 57:204-211.
- 646 47. Waldrop M, Balser T, Firestone M. 2000. Linking microbial community  
647 composition to function in a tropical soil. *Soil biology and biochemistry*  
648 32:1837-1846.
- 649 48. DeForest JL, Zak DR, Pregitzer KS, Burton AJ. 2004. Atmospheric nitrate  
650 deposition, microbial community composition, and enzyme activity in

- 651 northern hardwood forests. Soil Science Society of America Journal  
652 68:132-138.
- 653 49. Keeler BL, Hobbie SE, Kellogg LE. 2009. Effects of long-term nitrogen  
654 addition on microbial enzyme activity in eight forested and grassland sites:  
655 implications for litter and soil organic matter decomposition. Ecosystems  
656 12:1-15.
- 657 50. Carreiro M, Sinsabaugh R, Repert D, Parkhurst D. 2000. Microbial enzyme  
658 shifts explain litter decay responses to simulated nitrogen deposition. Ecology  
659 81:2359-2365.
- 660
